# Supplementary material
Source: publisher figshare collection journal article supplement (https://acs.figshare.com/ndownloader/files/7863349)
Supplement: Supplementary file 1 [file 7863349]

Compound	SMILES	MDM2 binding IC50	MDM2 binding Ki	SJSA-1 (IC50)
6	O=C1NC2=CC(Cl)=CC=C2[C@]13C4(CCCCC4)N[C@@H](C(N[C@@H]5CC[C@@H](O)CC5)=O)[C@@H]3C6=CC=CC(Cl)=C6F	17.2 ± 4.6	2.9 ± 0.8
7	O=C1NC2=CC(Cl)=CC=C2[C@]13C4(CCCCC4)N[C@@H](C(NC)=O)[C@@H]3C5=CC=CC(Cl)=C5F	21.2 ± 5.0	4.3 ± 1.3
8	O=C1NC2=CC(Cl)=CC=C2[C@]13C4(CCCCC4)N[C@@H](C(NC)=O)[C@@H]3C5=CC=CC(Cl)=C5F	>2000
9	O=C1NC2=CC(Cl)=CC=C2[C@]13C4(CCN(C)CC4)N[C@@H](C(NC)=O)[C@@H]3C5=CC=CC(Cl)=C5F	>2000
10	O=C1NC2=CC(Cl)=CC=C2[C@]13C4(CCN(C(C)=O)CC4)N[C@@H](C(NC)=O)[C@@H]3C5=CC=CC(Cl)=C5F	2110	525
11	O=C1NC2=CC(Cl)=CC=C2[C@]13C4(CCOCC4)N[C@@H](C(N[C@@H]5CC[C@@H](O)CC5)=O)[C@@H]3C6=CC=CC(Cl)=C6F	282	75.9
12	O=C1NC2=CC(Cl)=CC=C2[C@]13C4(CCC(F)(F)CC4)N[C@@H](C(N[C@@H]5CC[C@@H](O)CC5)=O)[C@@H]3C6=CC=CC(Cl)=C6F	41	9.8
13	O=C1NC2=CC(Cl)=CC=C2[C@]13C4(CCC4)N[C@@H](C(N[C@@H]5CC[C@@H](O)CC5)=O)[C@@H]3C6=CC=CC(Cl)=C6F	149 ± 32	19 ± 4
14	O=C1NC2=CC(Cl)=CC=C2[C@]13C4(CC(C)(C)C4)N[C@@H](C(N[C@@H]5CC[C@@H](O)CC5)=O)[C@@H]3C6=CC=CC(Cl)=C6F	14 ± 1.3	2.4 ± 0.4
15	O=C1NC2=CC(Cl)=CC=C2[C@]13C4(CCC(C)(C)CC4)N[C@@H](C(N[C@@H]5CC[C@@H](O)CC5)=O)[C@@H]3C6=CC=CC(Cl)=C6F	6.5 ± 0.9	<1
16	O=C1NC2=CC(Cl)=CC=C2[C@]13C4(CCCCC4)N[C@@H](C(N[C@@H]5CC[C@@H](O)CC5)=O)[C@@H]3C6=CN=CC(Cl)=C6	260 ± 29	77 ± 16
17	O=C1NC2=CC(Cl)=NC=C2[C@]13C4(CCCCC4)N[C@@H](C(N[C@@H]5CC[C@@H](O)CC5)=O)[C@@H]3C6=CC=CC(Cl)=C6F	52.6 ± 3	13.9 ± 0.8
18	O=C1NC2=NC(Cl)=CC=C2[C@]13C4(CCCCC4)N[C@@H](C(N[C@@H]5CC[C@@H](O)CC5)=O)[C@@H]3C6=CC=CC(Cl)=C6F	51.4 ± 0.9	13.2 ± 0.3
19	O=C1NC2=NC(Cl)=NC=C2[C@]13C4(CCCCC4)N[C@@H](C(N[C@@H]5CC[C@@H](O)CC5)=O)[C@@H]3C6=CC=CC(Cl)=C6F	56.8 ± 4.9	13.7 ± 2.2
20	O=C1NC2=C(SC(Cl)=C2)[C@]13C4(CCCCC4)N[C@@H](C(N[C@@H]5CC[C@@H](O)CC5)=O)[C@@H]3C6=CC=CC(Cl)=C6F	31.2 ± 3.7	6.5 ± 1.6
21	O=C1NC2=CC(Cl)=CC=C2[C@]13C4(CCCCC4)N(C)[C@@H](C5=NC(C(O)=O)=CS5)[C@@H]3C6=CC=CC(Cl)=C6F	12.8 ± 1.5	~1	>10
22	O=C1NC2=CC(Cl)=CC=C2[C@]13C4(CCCCC4)N(C)[C@@H](C5=NC(C(O)=O)=CO5)[C@@H]3C6=CC=CC(Cl)=C6F	27.5 ± 4.7	2.7 ± 0.6	>10
23	O=C1NC2=CC(Cl)=CC=C2[C@]13C4(CCCCC4)N(C)[C@@H](C5=NC(C)=NO5)[C@@H]3C6=CC=CC(Cl)=C6F	603 ± 177	81.2 ± 24.3	12.1
24	O=C1NC2=CC(Cl)=CC=C2[C@]13C4(CCCCC4)N(C)[C@@H](C5=NN=C(C)O5)[C@@H]3C6=CC=CC(Cl)=C6F	161	21	5
25	O=C1NC2=CC(Cl)=CC=C2[C@]13C4(CCCCC4)N(C)[C@@H](C5=NN=C(C)S5)[C@@H]3C6=CC=CC(Cl)=C6F	38.6 ± 22.3	4.2 ± 3.0	3
26	O=C1NC2=CC(Cl)=CC=C2[C@]13C4(CCCCC4)N(C)[C@@H](C5=NC(C(O)=O)=C(C)O5)[C@@H]3C6=CC=CC(Cl)=C6F	30.9 ± 1.7	3.1 ± 0.2	6
27	O=C1NC2=CC(Cl)=CC=C2[C@]13C4(CCCCC4)N(C)[C@@H](C5=NC(CC(O)=O)=CS5)[C@@H]3C6=CC=CC(Cl)=C6F	12.5 ± 1.1	~1.0	2.69
28	O=C1NC2=CC(Cl)=CC=C2[C@]13C4(CCCCC4)N(C)[C@@H](C5=NC(C(N)=O)=CS5)[C@@H]3C6=CC=CC(Cl)=C6F	156	20	NT
29	O=C1NC2=CC(Cl)=CC=C2[C@]13C4(CCCCC4)N[C@@H](C(O)=O)[C@@H]3C5=CC=CC(Cl)=C5F	200 ± 47	39 ± 8.7
30	O=C1NC2=CC(Cl)=CC=C2[C@]13C4(CCCCC4)N[C@@H](C(NS(=O)(C)=O)=O)[C@@H]3C5=CC=CC(Cl)=C5F	65 ± 14.1	12.8 ± 1.0
31	O=C1NC2=CC(Cl)=CC=C2[C@]13C4(CCCCC4)N[C@@H](C(NCCCC(O)=O)=O)[C@@H]3C5=CC=CC(Cl)=C5F	9.4 ± 2.8	<1
32	O=C1NC2=CC(Cl)=CC=C2[C@]13C4(CCCCC4)N[C@@H](C(N[C@@H]5C[C@@H](C(O)=O)C5)=O)[C@@H]3C6=CC=CC(Cl)=C6F	7.0 ± 1.8	<1
33	O=C1NC2=CC(Cl)=CC=C2[C@]13C4(CCCCC4)N[C@@H](C(N[C@@H]5CC[C@@H](C(O)=O)CC5)=O)[C@@H]3C6=CC=CC(Cl)=C6F	4.4 ± 0.9	<1
34	O=C1NC2=CC(Cl)=CC=C2[C@]13C4(CCCCC4)N[C@@H](C(N[C@@H]5CC[C@H](C(O)=O)CC5)=O)[C@@H]3C6=CC=CC(Cl)=C6F	20.4 ± 1.6	4.0 ± 0.8
35	O=C1NC2=CC(Cl)=CC=C2[C@]13C4(CCCCC4)N[C@@H](C(NC[C@@H]5CC[C@@H](C(O)=O)CC5)=O)[C@@H]3C6=CC=CC(Cl)=C6F	17.3 ± 1.0	2.2 ± 0.8
36	O=C1NC2=CC(Cl)=CC=C2[C@]13C4(CCCCC4)N[C@@H](C(NC5CCS(CC5)(=O)=O)=O)[C@@H]3C6=CC=CC(Cl)=C6F	20.7 ± 4.4	4.5 ± 1.4
37	O=C1NC2=CC(Cl)=CC=C2[C@]13C4(CCCCC4)N[C@@H](C(NC5CCN(CC(O)=O)CC5)=O)[C@@H]3C6=CC=CC(Cl)=C6F	19.0 ± 3.7	3.4 ± 0.3
38	O=C1NC2=CC(Cl)=CC=C2[C@]13C4(CCCCC4)N[C@@H](C(NC5CN(C(C)=O)C5)=O)[C@@H]3C6=CC=CC(Cl)=C6F	16.9 ± 3.8	3.4 ± 0.4
39	O=C1NC2=CC(Cl)=CC=C2[C@]13C4(CCCCC4)N[C@@H](C(NC5=CC=C(C(O)=O)C=C5)=O)[C@@H]3C6=CC=CC(Cl)=C6F	4.4 ± 1.1	<1	0.10 ± 0.03
40	O=C1NC2=CC(Cl)=CC=C2[C@]13C4(CCCCC4)N[C@@H](C(NC5=CC(C(O)=O)=CC=C5)=O)[C@@H]3C6=CC=CC(Cl)=C6F	8.8 ± 2.1	<1	0.762 ± 0.14
41	O=C1NC2=CC(Cl)=CC=C2[C@]13C4(CCCCC4)N[C@@H](C(NCC5=CC=C(C(O)=O)C=C5)=O)[C@@H]3C6=CC=CC(Cl)=C6F	9.9 ± 1.6	<1	NT
42	O=C1NC2=CC(Cl)=CC=C2[C@]13C4(CCCCC4)N[C@@H](C(NC5=CC=C(CC(O)=O)C=C5)=O)[C@@H]3C6=CC=CC(Cl)=C6F	17 ± 1.3	2.5 ± 0.6	0.760 ± 0.29
43	O=C1NC2=CC(Cl)=CC=C2[C@]13C4(CCCCC4)N[C@@H](C(NC5=CC=C(C(O)=O)C(OC)=C5)=O)[C@@H]3C6=CC=CC(Cl)=C6F	7.5	<1	0.124 ± 0.016
44	O=C1NC2=CC(Cl)=CC=C2[C@]13C4(CCCCC4)N[C@@H](C(NC5=CC=C(C(O)=O)C=C5OC)=O)[C@@H]3C6=CC=CC(Cl)=C6F	4.7 ± 1.5	<1	0.061 ± 0.008
45	O=C1NC2=CC(Cl)=CC=C2[C@]13C4(CCCCC4)N[C@@H](C(NC5=CC=C(C(O)=O)C(F)=C5)=O)[C@@H]3C6=CC=CC(Cl)=C6F	7.2 ± 3.6	<1	0.190 ± 0.06
46	O=C1NC2=CC(Cl)=CC=C2[C@]13C4(CCCCC4)N[C@@H](C(NC5=CC=C(C(O)=O)C=C5F)=O)[C@@H]3C6=CC=CC(Cl)=C6F	12.7 ± 5.1	1.2 ± 1.0	0.226 ± 0.06
47	O=C1NC2=CC(Cl)=CC=C2[C@]13C4(CCCCC4)N[C@@H](C(NC5=CC=C(C(O)=O)N=C5)=O)[C@@H]3C6=CC=CC(Cl)=C6F	9.5 ± 1.1	1.0 ± 0.3	0.240 ± 0.07
48	O=C1NC2=CC(Cl)=CC=C2[C@]13C4(CCCCC4)N[C@@H](C(NC5=CC=C(C(O)=O)O5)=O)[C@@H]3C6=CC=CC(Cl)=C6F	18	2.8	6.2
49	O=C1NC2=CC(Cl)=CC=C2[C@]13C4(CCCCC4)N[C@@H](C(NC5=CC=C(C(NS(C)(=O)=O)=O)C=C5)=O)[C@@H]3C6=CC=CC(Cl)=C6F	8.1 ± 0.7	<1	5.8
50	O=C1NC2=CC(Cl)=CC=C2[C@]13C4(CCCCC4)N[C@@H](C(NC5=CC=C(S(N)(=O)=O)C=C5)=O)[C@@H]3C6=CC=CC(Cl)=C6F	256	63	11.2
51	O=C1NC2=CC(Cl)=CC=C2[C@]13C4(CCCCC4)N[C@@H](C(NC5=CC=C(S(C)(=O)=O)C=C5)=O)[C@@H]3C6=CC=CC(Cl)=C6F	128	29	0.143
52	O=C1NC2=CC(Cl)=CC=C2[C@]13C4(CCCCC4)N[C@@H](C(NC5=CC=C(C(N)=O)C=C5)=O)[C@@H]3C6=CC=CC(Cl)=C6F	12	1.9	0.117 ± 0.018
53	O=C1NC2=CC(Cl)=CC=C2[C@]13C4(CCCCC4)N[C@@H](C(NC5=CC=C(C(N)=O)C=C5OC)=O)[C@@H]3C6=CC=CC(Cl)=C6F	14	2.2	0.115 ± 0.018
54	O=C1NC2=CC(Cl)=CC=C2[C@]13C4(CCC(C)(C)CC4)N[C@@H](C(NC5=CC=C(C(O)=O)C=C5)=O)[C@@H]3C6=CC=CC(Cl)=C6F	2.4 ± 0.8	<1	0.013 ± 0.003
55	O=C1NC2=CC(Cl)=CC=C2[C@]13C4(CCCCC4)N[C@@H](C(NC5(C6)CC6(C(O)=O)C5)=O)[C@@H]3C7=CC=CC(Cl)=C7F	6.4 ± 1.3	<1	0.542 ± 0.156
56	O=C1NC2=CC(Cl)=CC=C2[C@]13C4(CCCCC4)N[C@@H](C(NC5(CC6)CCC6(C(O)=O)CC5)=O)[C@@H]3C7=CC=CC(Cl)=C7F	3.7 ± 0.5	<1	0.089 ± 0.033
57	O=C1NC2=CC(Cl)=CC=C2[C@]13C4(CCC(F)(F)CC4)N[C@@H](C(NC5(CC6)CCC6(C(O)=O)CC5)=O)[C@@H]3C7=CC=CC(Cl)=C7F	11.5 ± 3.7	1.3 ± 0.6	0.165
58	O=C1NC2=CC(Cl)=CC=C2[C@]13C4(CCCCC4)N[C@@H](C(NC5(CC6)CCC6(C(NS(C)(=O)=O)=O)CC5)=O)[C@@H]3C7=CC=CC(Cl)=C7F	6.3 ± 2.3	<1	0.373
59	O=C1NC2=CC(Cl)=CC=C2[C@]13C4(CCCCC4)N(C)[C@@H](C(NC5(CC6)CCC6(C(O)=O)CC5)=O)[C@@H]3C7=CC=CC(Cl)=C7F	4.5 ± 1.0	<1	0.070 ± 0.021
60	O=C1NC2=CC(Cl)=CC=C2[C@]13C4(CCCCC4)N(CC)[C@@H](C(NC5(CC6)CCC6(C(O)=O)CC5)=O)[C@@H]3C7=CC=CC(Cl)=C7F	3.8 ± 1.1	<1	0.060 ± 0.022
